# Supplementary figures and images for: High-resolution mass spectrometric analysis of secondary organic aerosol produced by ozonation of limonene
Source: Royal Society of Chemistry journal article supplement (doi:10.1039/b712620d), 2007-12-10

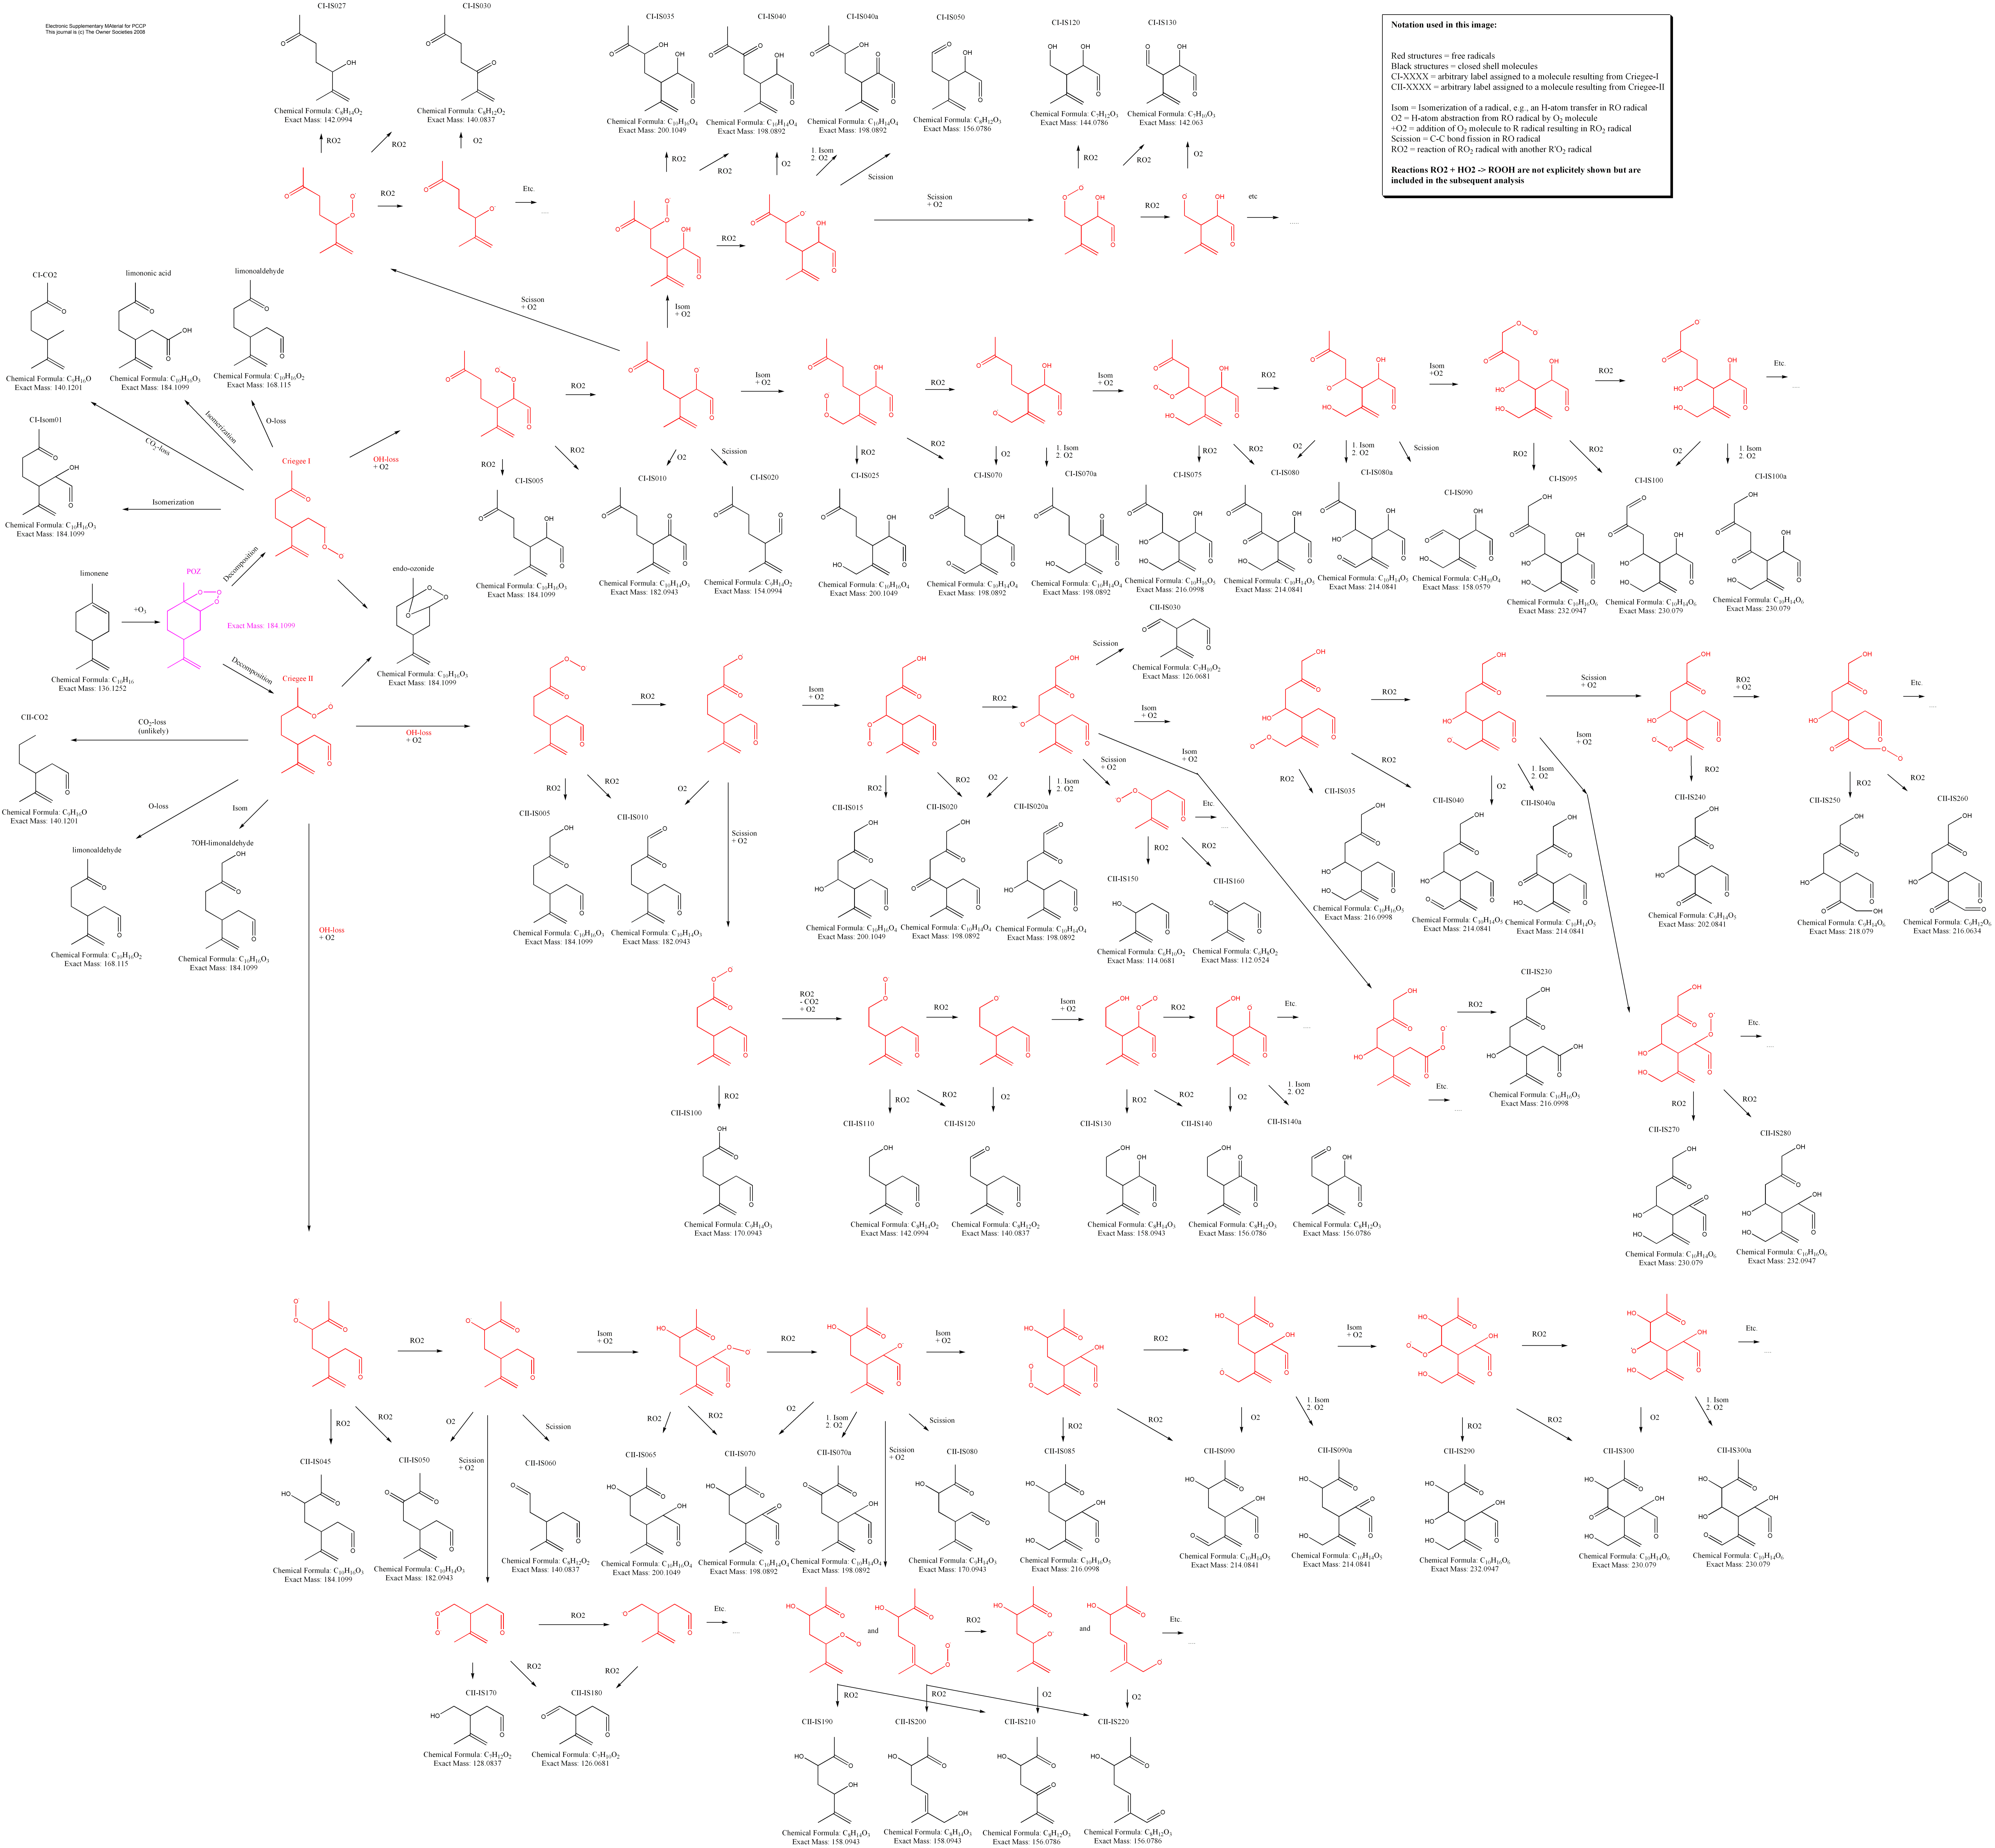

Supplement: b712620d.pdf [file b712620d.pdf]



Supplement: b712620d.pdf [file b712620d.pdf]
